# Supplementary material for: Imaging of voltage-gated alamethicin pores in a reconstituted bilayer lipid membrane via scanning electrochemical microscopy
Source: Royal Society of Chemistry journal article supplement (doi:10.1039/b510649d), 2005-11-30
Supplement: b510649d.pdf [file b510649d.pdf]

## Supplemental Information

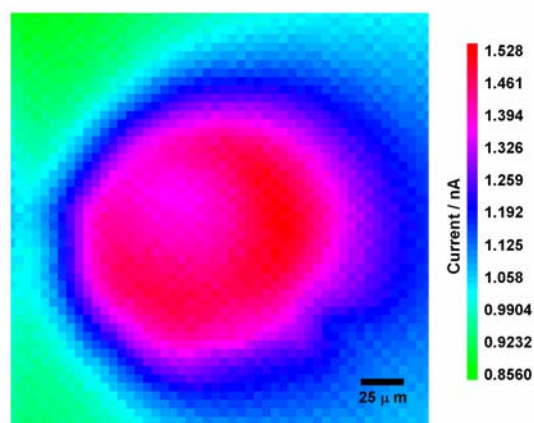

**Figure S1.** Topographical image of an aperture in a teflon septum containing a BLM. Topographical imaging was used to locate the septum aperture and BLM prior to imaging of transport across the BLM. [10 μm CF-UME, 1 mM Fc-TMA, 0.1 M KCl, 0.01 M HEPES, pH 7.0,  $E = 0.65$  V,  $i_{ss}(\text{Fc-TMA}, 1 \text{ mM}) = 1.02 \text{ nA}$ ].

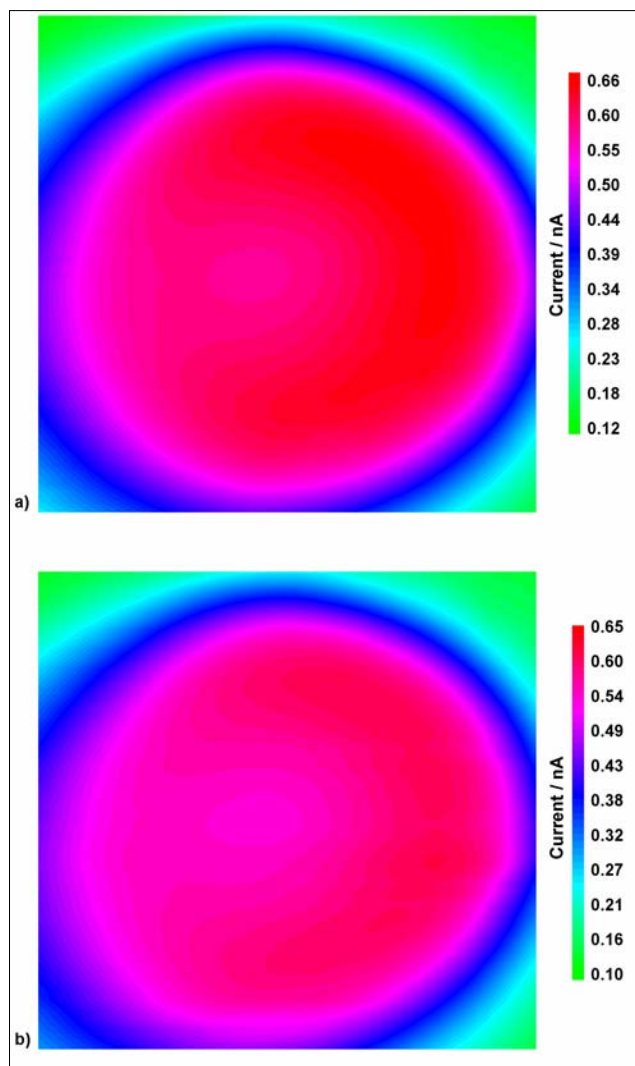

**Figure S2.** Results of a control experiment showing Ru-hex transport through a BLM without an inserted alamethicin pore, in the absence of (a) and in the presence of (b) a 50 mV membrane bias. [7  $\mu\text{m}$  CF-UME, 1 mM Ru-hex, 0.1 M KCl, 0.01 M HEPES, pH 7.0,  $E = -0.35$  V,  $i_{ss}(\text{Fc-TMA}, 1 \text{ mM}) = 1.9 \text{ nA}$ ].
